1 **Extracellular Electron Transfer Powers *Enterococcus faecalis* Biofilm Metabolism**

2 **Running Title: Iron promotes biofilm growth and EET in *E. faecalis***

3 Damien Keogh<sup>1#</sup>, Ling Ning Lam<sup>1,2#</sup>, Lucinda E. Doyle<sup>1,3</sup>, Artur Matysik<sup>1</sup>, Shruti Pavagadhi<sup>4</sup>,  
4 Shivshankar Umashankar<sup>4</sup>, Jennifer L. Dale<sup>5</sup>, Chris B. Boothroyd<sup>6</sup>, Gary M. Dunny<sup>5</sup>, Sanjay  
5 Swarup<sup>4,7</sup>, Rohan B. H. Williams<sup>4</sup>, Enrico Marsili<sup>1,8</sup>, and Kimberly A. Kline<sup>1,2,\*</sup>

6 <sup>1</sup>Singapore Centre for Environmental Life Science Engineering, Nanyang Technological  
7 University, 60 Nanyang Drive, Singapore 637551

8 <sup>2</sup>School of Biological Sciences, Nanyang Technological University, 60 Nanyang Drive,  
9 Singapore 637551

10 <sup>3</sup>Interdisciplinary Graduate School, Nanyang Technological University, Singapore 639798

11 <sup>4</sup>Singapore Centre for Environmental Life Science Engineering, National University of  
12 Singapore, 28 Medical Drive, Singapore, 114756

13 <sup>5</sup>Department of Microbiology, University of Minnesota Medical School, Minneapolis,  
14 Minnesota, USA

15 <sup>6</sup>School of Materials Science and Engineering, Nanyang Technological University, 50  
16 Nanyang Avenue, Singapore 639798

17 <sup>7</sup>Department of Biological Sciences, National University of Singapore, 14 Science Drive 4,  
18 Singapore 117543

19 <sup>8</sup>School of Chemical and Biomedical Engineering, Nanyang Technological University, 62  
20 Nanyang Drive, Singapore 637459

21 <sup>#</sup>Equal contribution

22 \*Correspondence: [kkline@ntu.edu.sg](mailto:kkline@ntu.edu.sg)

23 **Classification:** Biological Sciences – Microbiology

24 **Keywords:** *Enterococcus faecalis*, biofilm, iron, metabolism, extracellular electron transfer

## 25    **Abstract**

26    Enterococci are important human commensals and significant opportunistic pathogens  
 27    associated with endocarditis, urinary tract infections, wound and surgical site infections, and  
 28    medical device associated infections. These infections often become chronic upon the  
 29    formation of biofilm. The biofilm matrix establishes properties that distinguish this state from  
 30    free-living bacterial cells and increase tolerance to antimicrobial interventions. The metabolic  
 31    versatility of the Enterococci is reflected in the diversity and complexity of environments and  
 32    communities in which they thrive. Understanding metabolic factors governing colonization  
 33    and persistence in different host niches can reveal factors influencing the transition from  
 34    commensal to opportunistic pathogen. Here, we report a new form of iron-dependent  
 35    metabolism for *Enterococcus faecalis* where, in the absence of heme, respiration components  
 36    can be utilised for extracellular electron transfer (EET). Iron augments *E. faecalis* biofilm  
 37    growth and generates alterations in biofilm matrix, cell spatial distribution, and biofilm  
 38    matrix properties. We identify the genes involved in iron-augmented biofilm growth and  
 39    show that it occurs by promoting EET to iron within biofilm.

40

## 41     **Significance**

42     Bacterial metabolic versatility is often key in dictating the outcome of host-pathogen  
43     interactions, yet determinants of metabolic shifts are difficult to resolve. The bacterial biofilm  
44     matrix provides the structural and functional support that distinguishes this state from free-  
45     living bacterial cells. Here, we show that the biofilm matrix provides access to resources  
46     necessary for metabolism and growth which are otherwise inaccessible in the planktonic  
47     state. Our data shows that in the absence of heme, components of *Enterococcus faecalis*  
48     respiration (l-lactate dehydrogenase and acetaldehyde dehydrogenase) may function as  
49     initiators of EET through the cytoplasmic membrane quinone pool and utilize matrix-  
50     associated iron to carry out EET. The presence of iron resources within the biofilm matrix  
51     leads to enhanced biofilm growth.

52

## 53 **Introduction**

54 Human colonization by Enterococci initiates immediately at birth via gastrointestinal  
55 inoculation from maternal sources, diet, and the environment (1). *Enterococcus faecalis*  
56 represents a significant proportion of this early Enterococcal population and remains a stable  
57 member of the community throughout life (1). In the gastrointestinal tract, Enterococci are  
58 present in the lumen as well as in more specialized niches in the physicochemically complex  
59 mucus epithelial layer and epithelial crypts in the small intestine (2).

60 Bacterial biofilms contribute to host health and disease, and are complex systems that rely on  
61 the biofilm matrix to provide the structural and functional properties that distinguish this state  
62 from free-living bacterial cells (3). The dynamics of biofilm formation are dependent on  
63 many factors such as nutrient availability, environmental stress, social competition, and the  
64 generation of extracellular matrix materials. These extracellular polymeric substances provide  
65 the architecture surrounding the bacterial cells enabling emergent properties such as resource  
66 capture, tolerance to antimicrobial compounds, cooperation or competition, and localized  
67 gradients. Infections can become chronic through the development of biofilm. Antimicrobial  
68 interventions and colonization by multidrug resistant bacteria can influence endogenous gut  
69 microbiome diversity. In both adults and neonates in intensive care settings, gastrointestinal  
70 perturbations can result in the replacement of the endogenous Enterococci with  
71 aminoglycoside- or vancomycin-resistant Enterococci (4-6). Enterococci are also  
72 opportunistic pathogens associated with surgical site and wound infections, bacteraemia,  
73 urinary tract infections (UTI), catheter-associated UTI (CAUTI), and endocarditis (7-10).  
74 These infections can become chronic through the development of biofilm which is inherently  
75 more tolerant to antimicrobial therapies and immune clearance, a problem compounded by  
76 multidrug resistant Enterococci in healthcare settings.

77 The lactic acid bacteria, which include Enterococci, use an electron transport chain for  
 78 aerobic respiration when external heme is provided or, alternatively, can perform  
 79 fermentation in the absence of heme. *E. faecalis* does not synthesize heme *de novo* and  
 80 therefore lacks porphyrin rings required for cytochrome *bd* activity during cellular respiration  
 81 (11, 12). Similar to other members of the lactic acid bacterial group, *E. faecalis* does not have  
 82 a major growth requirement for nutritional iron, with manganese instead being used as the  
 83 essential cofactor for cellular processes (13-16). *E. faecalis* is also remarkably resistant to  
 84 oxidative stress from  $O_2^-$ , hydroxyl radicals ( $OH^\cdot$ ), and hydrogen peroxide ( $H_2O_2$ ) sources  
 85 from incomplete reduction of oxygen during respiration; from the oxidative action of host  
 86 immune cells; or that arise during the Fenton reaction (17, 18). These findings suggest that *E.*  
 87 *faecalis* may be able to withstand iron at concentrations which are typically toxic to most  
 88 bacterial species. In human serum, free iron is far below the  $10^{-7}$  to  $10^{-5}$  M optimal range  
 89 required to support the growth of most bacteria (19). However, iron availability in the host  
 90 can vary. Disease states such as haemochromatosis and thalassemia disrupt homeostasis and  
 91 cause excess iron accumulation (20, 21). Iron oxides have been detected in human spleens  
 92 and the iron concentration of the gastrointestinal tract is sufficient to support bacterial growth  
 93 (22, 23). Moreover, *E. faecalis* is tolerant to conditions of significant iron limitation and high  
 94 oxidative stress (13-18, 24, 25).

95 In this study, we hypothesize that the ability to withstand higher iron concentrations provides  
 96 a metabolic advantage to *E. faecalis*. We combine biofilm studies, transmission electron  
 97 microscopy (TEM), confocal laser scanning microscopy (CLSM), forward genetics, and  
 98 chronocoulometry to reveal a novel mode of biofilm-specific metabolism in *E. faecalis* where  
 99 the biofilm matrix harbours iron sinks involved in extracellular electron transport to support  
 100 biofilm growth. Understanding the metabolic factors that promote colonization and biofilm  
 101 formation in different environmental conditions may inform mechanisms governing the

- 102 switch from commensal to opportunistic pathogen and the spread of multidrug resistant
- 103 Enterococci in a number of ecological reservoirs.

## Results

### Iron supplementation promotes *Enterococcus faecalis* biofilm growth and alters biofilm

**matrix and matrix properties.** To understand the influence of iron on *E. faecalis* biofilm, we evaluated biofilm growth using ferric chloride (FeCl<sub>3</sub>) enriched medium. We analyzed biofilm by confocal laser scanning microscopy (CLSM) in the absence (normal) and presence (supplemented) of additional FeCl<sub>3</sub> in a flow cell biofilm system. Using a GFP-expressing *E. faecalis* strain, we observed augmented biofilm accumulation as early as 8 hours in medium supplemented with 0.2 mM FeCl<sub>3</sub> compared to normal medium (Fig. 1a). Iron-enhanced biofilm growth continued for 18 hr, in contrast to the thinner normal biofilm. Iron supplementation did not augment *E. faecalis* growth in planktonic culture (Fig. S1) indicating that the promotion of *E. faecalis* growth is a biofilm specific phenotype. For detailed visualization of *E. faecalis* cell distribution and biofilm architecture properties, we created 3D reconstructions of high magnification CLSM stacks (Fig. 1b). At 18 hr, 37 °C *E. faecalis* biofilm forms a flat monolayer in the normal medium as reported previously (26, 27). By contrast, *E. faecalis* biofilm is thicker and the bacterial cells are distributed throughout the iron supplemented biofilm. Increased biofilm thickness indicates an expansion in biofilm matrix in the supplemented medium suggesting a role for the matrix in iron-enhanced biofilms. We further hypothesized that *E. faecalis* gains a metabolic advantage by the supplementation of iron which in turn affects growth rate. We reasoned that by reducing the temperature we could slow the *E. faecalis* growth rate and possibly modulate the dependence on iron supplementation. At 120 hr, *E. faecalis* grown at 22 °C forms a sparse monolayer biofilm in normal medium; however, the biofilm expands to a depth of greater than 24 µm (the image resolution limit of CSLM) and increased cell density in iron supplemented medium. To evaluate morphological changes in *E. faecalis* cells or the biofilm matrix, we analyzed biofilm cells grown in flow chambers by transmission electron microscopy (TEM).



We observed typical diplococcal *E. faecalis* in the normal biofilm cells with an abundance of extracellular fibrous material in the matrix (Fig. 2a,b,c). Constituents of the *E. faecalis* biofilm matrix are not well-understood; however, *E. faecalis* can actively secrete eDNA in biofilms, and DNase treatment can disperse *E. faecalis* biofilms suggesting eDNA is a major component of the matrix (28-30). The TEM images of the iron supplemented biofilm are similar to normal biofilm (Fig. 2a,b,c), with the exception of electron-dense particles associated with the extracellular fibrous matrix material (Fig. 2d,e,f). Using energy-dispersive X-ray spectroscopy (EDS) in a TEM to analyse the same samples, we demonstrated the extracellular electron-dense particles to be enriched in iron (Fig 2g-m) and hypothesize that these iron deposits together with the increased biomass observed by CSLM are important for augmented *E. faecalis* biofilm formation.

**Iron-induced *Enterococcus faecalis* growth is biofilm specific and iron availability impacts the metallome.** To determine if redox-active metals other than iron could also augment *E. faecalis* biofilm formation, we performed biofilm assays with quantification via crystal violet (CV) staining in microtitre plate format to increase throughput (31). In all biofilm assays we included abiotic media controls with metals supplemented to monitor metal precipitation and found that no metals fell out of solution at the concentrations tested in these assays (see Material and Methods – Biofilm Assays, Fig S1). Consistent with *E. faecalis* biofilm augmentation observed when grown in flow cells with 0.2 mM FeCl<sub>3</sub> supplemented (Fig. 1a,b), FeCl<sub>3</sub> enriched medium facilitated enhanced *E. faecalis* biofilm growth over time (0 to 120 hr) compared to the normal medium (Fig. 3a). The biofilm increased significantly in response to increasing FeCl<sub>3</sub> supplementation with 0.5 to 2 mM providing the optimal concentration range in this assay. Above these concentrations, growth was also enhanced but not as significantly compared to the non-supplemented control. We next investigated the capacity of different metal species for enhanced *E. faecalis* biofilm accumulation and found

that supplementation with ferrous sulfate ( $\text{FeSO}_4$ ) or ferric sulfate ( $\text{Fe}_2(\text{SO}_4)_3$ ) also increased *E. faecalis* biofilm growth; whereas ferric citrate, magnesium chloride, zinc chloride, or copper chloride had negligible influence on *E. faecalis* biofilm accumulation (Fig 3b). Manganese chloride had a modest augmenting effect on biofilm formation. Heme supplementation at concentrations from 0 to 150  $\mu\text{M}$  also significantly promoted biofilm accumulation and is likely the result of enhanced activity in cytochrome *bd* since heme functions as a cofactor for this enzyme and drives *E. faecalis* to aerobic respiration (32). TEM analysis (Fig. 2d, e, f) revealed iron deposits in the extracellular biofilm matrix of the iron supplemented cultures, whereas no extracellular deposits were observed for biofilms supplemented with heme (Fig S3). We therefore hypothesized that iron concentrations in the *E. faecalis* intracellular metallome would remain stable between the normal and iron supplemented cultures. We used inductively coupled plasma mass spectrometry (ICP-MS) to quantify the intracellular metallome of *E. faecalis* in the absence (normal) and presence (supplemented) of  $\text{FeCl}_3$  supplementation (Fig. 3d, Table S1). The overall intracellular metal content when grown in iron-supplemented medium (3125 ppb) was actually lower than when grown in the normal medium (4641 ppb). Iron was present at 675 ppb in the supplemented samples and 20 ppb in the normal samples. However, the increase in intracellular iron concentration was coincident with a decrease in intracellular cobalt and zinc when *E. faecalis* was grown in iron-supplemented medium. Together, this data suggested that iron was substituting for other metals in the supplemented medium and that the substitution was likely to be functionally balanced. Iron, cobalt, and zinc are transition metals that can function as interchangeable ions and can compete with iron for binding to metalloproteins (33). We hypothesized that identifying genes involved in metal acquisition would help determine if intracellular iron was important for iron-enhanced biofilm growth. We selected 21 mutants of uncharacterized *E. faecalis* membrane transport or regulation systems, with homology to

previously characterized metal-associated proteins in other bacteria, from a sequenced mariner transposon library and measured intracellular metal content by ICP-MS (Table S2, S3, S4) (34). These mutants did not have significant changes in intracellular iron concentration in the normal or supplemented medium, with only cobalt and zinc displaying significant changes in some of the mutants and only in the normal medium (Table S2). Because bacterial iron transport systems are generally expressed under iron limitation, we tested these mutants in an iron chelated medium where *E. faecalis* planktonic growth has previously been shown to be growth limited (25). We detected an absence of intracellular iron in 15 mutants under iron limited growth (Table S5) suggesting that these genes govern iron acquisition and may only be active under conditions of low iron availability. Overall, the ICP-MS analysis has demonstrated the modulation of the *E. faecalis* metallome when cultured at different iron concentrations and identified systems involved in metal acquisition. However, this study did not identify any systems involved in iron acquisition in the supplemented medium suggesting that they are not involved or there is a large amount of overlapping functionality in iron transport in *E. faecalis*. These findings support the hypothesis that extracellular electron-dense particles are important for augmented *E. faecalis* biofilm growth in the presence of iron.

**Components of *E. faecalis* metabolism contribute to iron-induced biofilm growth.** To determine the mechanism underlying iron-enhanced *E. faecalis* biofilm, we screened a near-saturated *E. faecalis* mariner transposon library for changes in biofilm formation in media supplemented with 2 mM FeCl<sub>3</sub> (34). Using the CV biofilm assay, we screened the transposon library for mutants displaying either loss or further enhancement of biofilm growth (Fig. S4a). Mutants displaying altered biofilm growth in iron supplemented media were also examined for alterations in planktonic growth in normal or supplemented media, to

eliminate mutants with general fitness defects (Fig. S4a). Because we were seeking factors specifically involved in biofilm formation in excess iron, and not general biofilm factors, we performed a secondary biofilm assay to exclude mutants that displayed altered biofilm in both iron supplemented and normal medium (Fig. S4b-g). The final *E. faecalis* transposon mutants that specifically altered biofilm formation in excess iron included *phoH*, *ldh1*, *trxB2*, OG1RF\_11340, OG1RF\_10589, and an intergenic region (Table S6). The predicted functions for all of the gene products were associated with metabolism functions and membrane transport.

**Extracellular electron transfer to iron occurs in *E. faecalis* biofilm.** Dissimilatory metal-reducing bacteria, such as *Shewanella* spp. and *Geobacter* spp., take advantage of extracellular redox-active metals as terminal electron acceptors for respiration by EET (35, 36). *Shewanella* spp. and *Geobacter* spp. both have functional iron transport and regulation systems for intracellular iron homeostasis (37, 38). EET can function by both direct electron transfer (DET), which involves outer membrane c-type cytochromes (39) and mediated electron transfer (MET), which avails of microbially produced redox mediators (40-43). Our data indicate that genes involved in energy production, redox control, and membrane transport contributed to iron-augmented biofilm formation (Table S2). We also observed iron deposits in the biofilm matrix that surrounds the bacterial cell surfaces of iron-enhanced biofilm (Fig. 2d, e, f, k, m). We therefore hypothesized that the extracellular iron associated with *E. faecalis* biofilm matrix may function as electron sinks via either DET or MET during biofilm metabolism, where Fe(III) is reduced to Fe(II) by *E. faecalis*. To test this, we used chronocoulometry to measure EET of *E. faecalis* biofilms grown in electrochemical cells on a carbon screen-printed electrode (SPE) maintained at high oxidative potential. In the case of DET, extracellular Fe(III) would be reduced by *E. faecalis* and subsequently re-oxidized in

part by the electrode in order to regenerate it for further use as an electron acceptor by *E. faecalis*. Alternatively, if the specific mode of EET was MET, we would detect iron acting as a mediator/electron shuttle, carrying electrons extracellularly between *E. faecalis* and the electrode. Electrons are only detected at the electrode surface, and as such any intracellular iron reduction cannot be measured. Thus, in the case of either DET or MET, chronocoulometry allows for the monitoring whether *E. faecalis* is capable of sustained EET when oxidized iron was in its environment in real-time. Additionally, this electrochemical technique measures the integral of current over time, i.e., the charge transferred to the electrode over time (35). Chronocoulometry is commonly used to measure the electron transfer process in redox systems (35, 44). In whole cell bioelectrochemical systems, chronocoulometry is preferred over chronoamperometry to provide a quantitative measure of charge transfer (45). Chronocoulometry was previously used to measure MET in *Pseudomonas aeruginosa* (42). We observed that *E. faecalis* biofilms grew on the carbon electrode (Fig S5a, b) and generated extracellular current in iron supplemented medium, while all abiotic media controls and *E. faecalis* biofilms grown in normal medium did not yield a current (Fig. 4a). Moreover, extracellular current generation was specific to the addition of iron, because we observed no current upon the addition the other biofilm-augmenting metals magnesium, manganese, or heme (Fig. S5c). We then tested the six mutants identified through the transposon screen for the generation of extracellular current in the supplemented medium. Two of the six mutants displayed significantly reduced current as compared to the parental strain. These mutants contained transposon insertions in the genes *ldhI* and OG1RF\_11340 suggesting that l-lactate dehydrogenase and acetaldehyde dehydrogenase were involved in extracellular electron transfer in *E. faecalis*. Complementation studies could not be performed because all attempts to clone *ldh* or *adh* on a plasmid *in trans* resulted in an accumulation of mutations preventing the expression of the

gene product, presumably due to cytotoxic effects of heterologous metabolic enzyme expression in *E. coli*. To validate that extracellular iron was required as either an electron acceptor (DET) or electron mediator/shuttle (MET), we spiked the electrochemical cell with the chelator 2,2'-dipyridyl to sequester iron. In the presence of iron chelation, we observed a significant reduction in current (Fig. 4b), demonstrating that extracellular iron was instrumental to the process of EET.

Taken together, our results establish a model for *E. faecalis* biofilm metabolism where EET using biofilm matrix associated iron supports biofilm growth (Fig. 5). We propose that in the absence of heme, as was the condition in this study, where cytochrome *bd* would be non-functional for aerobic respiration, fermentation end-products such as lactate and acetaldehyde can be used as substrates by l-lactate dehydrogenase (LHD) and acetaldehyde dehydrogenase (ADH) to generate a modification of the electron transport chain. We suggest that these dehydrogenases may act as electron donors transferring electrons to the cytoplasmic membrane quinone (dimethyl menaquinone) pool and ultimately use iron in the biofilm matrix to carry out EET.

## Discussion

In this study, we characterize a new form of *E. faecalis* metabolism where EET utilising iron results in superior biofilm growth. Understanding the diversity of metabolic possibilities may be important for understanding how *E. faecalis* colonizes different niches such as the human gastrointestinal tract which harbours an abundance of iron (46). Iron rich niches also occur in disease states such as haemochromatosis and thalassemia where iron homeostasis is defective (20, 21). *E. faecalis* is a significant opportunistic pathogen and biofilm development strengthens its tolerance to antimicrobial therapies and immune clearance (7-10). Enterococcal metabolic versatility supports its survival in diverse and complex environments and communities, thus increasing the possibility of dissemination to new niches when iron is present (47). Communities within biofilm are dependent on nutrient and oxygen gradients, cell-to-cell contact and communication, and metabolic cooperation (3). Matrix-associated iron deposits are accessible simultaneously by a number of *E. faecalis* cells and can therefore function as a shared biofilm community resource to enhance biofilm growth.

Our findings demonstrate that *E. faecalis* is electroactive and can utilize EET using iron in the biofilm matrix, via either DET or MET, to enhance biofilm growth. In our model, glycolysis and fermentation proceed prior to EET-dependent respiration to generate the end-product substrates for dehydrogenases acting as electron donors. DET would occur by a mechanism where extracellular iron can be reduced and become an iron sink for electrons of the respiratory electron transport chain. Part of this reduced iron is then reoxidized at the electrode, serving as an electron mediator/shuttle. While further studies are needed to resolve the details of the EET mechanism to iron and to the electrode, these findings extend the current knowledge regarding the extent of EET-capable bacterial species and environments, which are primarily viewed in the context of energy recovery in systems such as microbial fuel cells (36). The characterization of a role for EET in *E. faecalis* metabolism furthers our

understanding of possible mechanisms governing colonization and persistence in host niches. Previous studies have demonstrated cell surface-associated oxidation/reduction potential and capacity to utilize exogenously added soluble redox mediators in some Gram-positive bacteria (48, 49). By contrast, we use chronocoulometry to quantify iron-related metabolism in real time, as seen by the sustained generation of an electron flow by the biofilm, leading to augmented biofilm growth. Chronocoulometry quantifies charge transfer at the electrode surface and as such can only detect extracellular iron reduction. In addition, chronocoulometry can show bacterial that derived extracellular electron transfer is sustainable, whereas other commonly used techniques such as cyclic voltammetry can only demonstrate the presence of redox-active moieties on the cell surface and cannot predict whether sustained electron transfer will be possible.

*E. faecalis* and other lactic acid bacteria (LAB) encode the components necessary for aerobic respiration metabolism (50). These are: (1) NADH dehydrogenases functioning as electron donors, (2) a quinone pool to transfer electrons to (3) the terminal electron acceptor complex cytochrome oxidase (51). The *E. faecalis* cytochrome *bd* enzyme can only use oxygen as a terminal electron acceptor when exogenous sources of its co-factor heme are available (11, 52). *E. faecalis* does not synthesise porphyrin and in the absence of heme relies on fermentation. Our experimental assays mimic the absence of heme as this is absent from the growth medium. Our bioelectrochemical data suggests that *E. faecalis* l-lactate and acetaldehyde dehydrogenases function as electron donors for EET to biofilm matrix associated iron sinks. Dehydrogenases transfer hydride from one substrate to another in a reversible reaction that relies on the interconversion of NADH and NAD<sup>+</sup>. Previous studies suggest that, in contrast to most bacterial species that rely on the tricarboxylic acid cycle (TCA) to produce NADH, LAB instead rely on fermentation for its production (53). Fermentation therefore is a necessary metabolic phase prior to the use of EET to support



biofilm metabolism. In *Lactococcus lactis*, a fermenting LAB strain, activation of respiration metabolism in the absence of heme and oxygen reduction occurs by copper reduction via the menaquinone pool (54). This supports our finding that extracellular iron functioning as a electron acceptor and/or mediator can activate respiration metabolism in the absence of heme and cytochrome *bd* activity.

Our biofilm data demonstrates an iron-specific *E. faecalis* enhanced biofilm growth response, with only FeCl<sub>3</sub>, heme, FeSO<sub>4</sub> and Fe<sub>2</sub>(SO<sub>4</sub>)<sub>3</sub> stimulating the response. Heme availability enables respiration through cytochrome *bd* activity in the presence of oxygen (32). FeSO<sub>4</sub> and Fe<sub>2</sub>(SO<sub>4</sub>)<sub>3</sub> are more labile to oxidative changes and precipitation, required for DET-driven iron reduction, than the more soluble ferric citrate which does not enhance biofilm growth. While flow cell biofilm generated enhanced growth at 0.2 mM FeCl<sub>3</sub>, the static biofilm assays only detected enhanced growth from 0.5 to 2 mM FeCl<sub>3</sub> supplementation.

*E. faecalis* can flourish in iron limited environments and tolerate oxidative stress which can be induced by a high iron environment, contrasting with many other bacterial species where iron is an essential growth nutrient and requires strict iron homeostasis (55). Nonetheless, our ICP-MS analysis shows that iron represents a large proportion of the *E. faecalis* metallome under normal conditions. The modulation of the *E. faecalis* metallome with changes in conditions of either iron limitation or abundance suggests alternative roles for this metal. The absence of detectable iron in the *E. faecalis* mutants with disruptions in genes predicted to encode iron transport and regulatory components, analyzed by ICP-MS under iron limitation, suggests these gene products function in iron acquisition. Previous transcriptomic studies propose roles for *E. faecalis* transport systems in iron acquisition; however our ICP-MS analysis is the first functional characterization of these systems (56, 57). Manganese has been reported to substitute for iron as a cofactor in essential cellular reactions of LAB species, however our data demonstrate that iron represents a greater proportion of the *E. faecalis*

metallome than manganese in normal and supplemented conditions (14, 15). The ICP-MS analysis equally highlights that a number of other metals such as zinc, potassium, and magnesium are abundant. Cobalt and zinc are important metals for bacterial growth and we have identified a number of genes governing cobalt and zinc utilization in *E. faecalis* (58). While the intracellular iron levels in the iron supplemented medium was greater than that of the normal condition, no iron transport systems could be identified under these conditions. The absence of detectable transport systems by ICP-MS and the presence of extracellular electron dense deposits in our TEM data suggests that our model of EET would favour DET rather than MET. However, overlapping functionality in nutrient transport is a common strategy for bacteria so single gene mutations may not be sufficient in this condition. Intracellular storage of iron may be strategic in anticipation of acceptor-limited conditions where this metal can be deposited extracellularly.

Colonization and persistence in host niches require adaptability in the exploitation of available resources for energy production and growth. *E. faecalis* is an important human commensal and opportunistic pathogen present in the gastrointestinal tract throughout life. Our work highlights a new form of metabolism where, in the absence of heme, components of respiration can be utilized for EET using extracellular iron. This deeper understanding of mechanisms governing biofilm metabolism in human and clinically relevant bacterial species will enhance approaches to modify or eradicate these reservoirs.

## Materials and Methods

### Bacterial Strains and Growth Conditions. *Enterococcus faecalis* OG1RF

(ATCC47077)(59) was grown in Brain Heart Infusion broth (BHI) and cultured at 37 °C under static conditions. *E. faecalis* SD234 is an OG1RF strain derivative harbouring a constitutively expressed *gfp* gene (60). Overnight cultures were normalized to  $2-4 \times 10^8$  CFU/ml in phosphate buffered saline (PBS), equivalent to OD<sub>600nm</sub> 0.7 for *E. faecalis*. For planktonic and biofilm assays, bacteria were cultured at 37 °C (under 200 rpm orbital shaking or static conditions, respectively) with tryptone soya broth supplemented with 10 mM glucose (TSBG) and solidified with 1.5 % agar when appropriate (Oxoid Technical No.3). BHI was supplied by Becton, Dickinson and Company, Franklin Lakes, NJ. TSB and agar was supplied by Oxoid Inc., Ontario, Canada. Metals for supplementation were added during medium preparation. These metals and the chelator 2,2'dipyridyl were supplied by Sigma Aldrich, St Louis, MO, USA.

### Biofilm Assay.

Bacterial cultures were normalized as described above and inoculated at  $1.6-3.2 \times 10^6$  CFU/200µl microtiter well in TSBG in a 96-well flat bottom transparent microtiter plate (Thermo Scientific, Waltman, MA, USA), and incubated at 37°C under static conditions. Uninoculated media controls with metals supplemented to the highest concentration relevant to the assay were included to check for supplemented metal precipitation. Supernatants were discarded and the microtitre plate washed twice with PBS. To stain surface adherent bacteria, 200 µl of crystal violet solution at 0.1% w/v (Sigma-Aldrich, St Louis, MO, USA) was added to each well and incubated at 4 °C for 30 minutes. This solution was discarded and the microtitre plate washed twice with PBS followed by crystal violet solubilization with 200 µl per well ethanol-acetone (4:1) for 45 minutes at room temperature. The intensity of crystal violet staining was measured by absorbance at OD<sub>595nm</sub>

using a Tecan Infinite 200 PRO spectrophotometer (Tecan Group Ltd., Männedorf, Switzerland).

**Flow Cell Biofilm Assay.** Flow cell biofilm studies were performed as previously described with minor modifications (61). Bacterial cultures were normalized to  $2-4 \times 10^6$  CFU/ml in PBS and 250  $\mu$ l of this stock injected through the Stovall flow cell system inlet silicon tube connected to the flow cell chamber. This inoculation was performed when the system flow was halted by clamping both the inlet and outlet silicon tubes. The chamber was inverted for one hour to facilitate bacterial adherence to the glass slide surface. The flow cell system was then reset, unclamped, and the medium feed was set to 4.5 ml/hr.

**Transposon Library Screen.** The cryogenically stocked, 96-well format *E. faecalis* OG1RF mariner transposon library consisted of 14978 individual mutants (34). This library was cultured using a cryo-replicator (Adolf Kühner AG) to inoculate DeepWell blocks (Greiner Bio-One) containing 1ml BHI medium for overnight incubation at 37 °C with shaking at 220 rpm. Cultures were normalized to OD<sub>600nm</sub> 0.1 ( $2-4 \times 10^8$  CFU/ml) in PBS with the Tecan Infinite® 200 PRO spectrophotometer (Tecan Group Ltd., Switzerland) using a 96 well microtiter plate. The primary screen of the library was performed by inoculating a microtitre well with  $1.6-3.2 \times 10^6$  CFU/200 $\mu$ l in TSBG medium supplemented with 2 mM FeCl<sub>3</sub>. The microtitre plates were then incubated at 37 °C, statically, inside a moistened chamber to prevent evaporation of media. Biofilm was quantified by crystal violet staining as described above. Mutants with either reduction or further enhancement of biofilm signal compared to wild type controls were then validated using two independent biological replicates for each mutant in TSBG biofilm assays. This primary validation was followed by a planktonic growth validation in TSBG and TSBG medium supplemented with 2 mM FeCl<sub>3</sub>. A secondary validation using three independent biological replicates for each mutant was performed in

biofilm assays with TSBG and TSBG medium supplemented with 2 mM FeCl<sub>3</sub> to eliminate any mutants exhibiting defects in biofilm formation under normal conditions.

**Mapping Tn Insertions.** gDNA was extracted using the Wizard® Genomic DNA Purification Kit (Promega) from transposon mutants that were not originally mapped. The gDNA quantified and assessed for nucleic acid quality by Qubit High Sensitive dsDNA assay (Invitrogen) and NanoDrop. Sequencing was performed using an Illumina MiSeq. *de novo* reads were assembled using CLC Genomics Workbench version 8.0 and *E. faecalis* OG1RF as a template. The Tn insertion site was identified by BLAST using the mariner transposon sequence and identification of the flanking genomic sequence. Transposon mutant strains were named to include library location information, gene name or intergenic information, followed by “TnMar”. For example, (4.2A1 F1)10589:TnMar indicates the transposon mutant for OG1RF\_10589 located in block 4.2A1 of the library in position F1 of the microtitre plate.

**Electrochemical Setup and Analysis.** Screen printed electrodes (SPE) (model DRP-C110; DropSens, Spain) consisting of a carbon working electrode, carbon counter electrode, and silver reference electrode were controlled by a multichannel potentiostat (Bio-Logic, France) in an electrochemical cell of 9 ml working volume sealed with a Teflon cap. Chronocoulometry was used to characterize the electrochemical activity of live microbial cultures by measuring the charge passed over the course of growth, with the total charge in mC at 40 hr used for comparison. During chronocoulometry, the working electrode was poised at 200 mV vs the silver pseudoreference electrode of the SPE. This potential was chosen as it is high enough to re-oxidise the reduced iron, while being low enough to avoid damaging the bacteria. By applying a set potential to an electrode acting as an electron acceptor, the extracellular current generated can be tracked with time, the integral of which represents the total charge passed. By looking at the charge passed at a fixed time, the

electroactivity of a culture/mutant etc. can be established. Bacterial stocks of  $2-4 \times 10^8$  CFU/ml for electrochemical experiments were prepared as described above, and electrochemical cells inoculated to  $2-4 \times 10^5$  CFU/ml. All electrochemical experiments were conducted at 37 °C using TSBG medium supplemented with 2 mM FeCl<sub>3</sub> unless otherwise stated. The iron chelator, 2,2'-dipyridyl (Sigma Aldrich, USA), was spiked in selected experiments to quench EET.

**Thin-section Transmission Electron Microscopy (TEM).** Biofilms were grown using the flow cell protocol or the standard biofilm protocol described, but with the latter using a 6-well plate. The flow cell biofilm was resuspended in a 2 % paraformaldehyde-2.5 % glutaraldehyde solution (Polysciences Inc., Warrington, PA) in 100 mM PBS (pH 7.4) for 1 hr at room temperature. The samples were then embedded in 2 % low-melt agarose, washed in PBS and post-fixed in 1 % osmium tetroxide for 1 hr. Samples were rinsed extensively in distilled water (dH<sub>2</sub>O) prior to *en bloc* staining with 1 % aqueous uranyl acetate (Ted Pella, Inc., Redding, CA, USA) for 1 hr. Following several rinses in dH<sub>2</sub>O, samples were dehydrated in a graded series of ethanol and embedded in Eponate 12 resin (Ted Pella, Inc., Redding, CA, USA). Sections of 95 nm were cut with a Leica Ultracut UCT ultramicrotome (Leica Microsystems, Inc., Bannockburn, IL, USA), stained with uranyl acetate and lead citrate, and viewed on a JEOL 1200 EX transmission electron microscope (JEOL USA, Inc., Peabody, MA, USA).

#### **Energy-dispersive X-ray spectroscopy (EDS) TEM**

Samples were prepared as described above for TEM and viewed on an aberration-corrected JEOL ARM 200 cold field-emission gun transmission electron microscope in high-angle annular dark-field scanning transmission (HAADF STEM) mode using spot size 6. The sample was held in a JEOL Be double tilt holder tilted by about 12 ° towards the X-ray

detector. STEM images were collected using a JEOL annular dark-field detector on a Gatan Digiscan with 2048×2048 pixels and a dwell time of 10 μs. Energy dispersive X-ray maps were collected using an Oxford Aztec system with a 0.7 sr collection solid angle by scanning the beam with multiple frames over a period of about 5 minutes at a resolution of 512×512 pixels.

**Confocal Laser Scanning Microscopy and 3D Reconstruction.** Biofilm morphology, biovolume, and cell distribution were analyzed by CLSM directly from flow cell chamber glass microscope slides at three separate locations (inlet, middle and outlet areas) with 3 individual Z-stack images per technical replicate. Images were acquired using LSM780 confocal microscope (Zeiss, Germany) equipped with 20x/0.8 Plan-Apochromat objective and controlled by ZEN software. Samples were illuminated with a 488 nm Argon laser line and the GFP emitted fluorescence was collected in the 507-535 nm range. Optical sections (425×425 μm) were collected every 5 μm through the entire biofilm thickness and signal from each section was averaged 2-4 times. Fiji software (62) was used for further processing (levels adjustment, stack reslice). For the 3D biofilm reconstructions, optical slices (85×85 μm) were acquired with 63x/1.4 Plan-Apochromat oil immersion lens every 0.3μm through entire biofilm thickness or until loss of the fluorescence signal (due to light scattering, absorption, and possible fluorescence quenching of thick iron-supplemented biofilms). The center of mass for each cell in 3D space was found using MosaicSuite for Fiji (63), then coordinates were filtered in R (64). To visualize the biofilm matrix and spatial organization coordinates were plotted as spheres with cell-size diameter and color coded Z-depth.

**Inductively Coupled Plasma Mass Spectroscopy (ICP-MS).** *E. faecalis* cultures were prepared as previously described with minor modifications (65). Overnight cultures were normalized as described above and 1-2×10<sup>5</sup> CFU/well was inoculated into DeepWell blocks (Greiner Bio-One) containing 2 ml TSBG medium and incubated overnight at 37 °C under

static conditions. Three biological replicates with five technical replicates were prepared for each *E. faecalis* strain and, following incubation, the technical replicates were pooled prior to preparation for ICP-MS. Harvested cell pellets were washed with 10 mM EDTA (Ambion™ Thermofisher Scientific, USA) prepared in LC-MS grade dH<sub>2</sub>O (Sigma Aldrich, St Louis, MO, USA) and washed three times with LC-MS grade dH<sub>2</sub>O. Cells were then concentrated to 2-4x10<sup>8</sup> CFU/ml in LC-MS grade dH<sub>2</sub>O. Each cell pellet was digested in 500 µl of 69 % nitric acid and 250 µl of 31 % hydrogen peroxide. Following sample digestion, all the samples were diluted with LC-MS grade dH<sub>2</sub>O to a 2 % (w/v) nitric acid concentration in the final solution.

An Agilent 7700 series model ICP-MS system (Agilent, Santa Clara, CA, USA) was used for simultaneous determination of selected elements [Mg, Al, P, K, Ca, V, Cr, Mn, Fe, Co, Ni, Cu, Zn] in prepared *E. faecalis* samples. Prior to sample measurement and quantification, stock solutions of a multi-element calibration standard (Inorganic Ventures, VA, USA) were serially diluted (0 µg/L to 1000 µg/L) and run on the system. For each measurement (standards, samples, blanks, and quality controls), addition of internal standard (Sc; 100 mg/L, Agilent, USA) was performed to correct for physical matrix effects. Blanks were determined together with samples for every run and the mean of three runs was determined for each sample. Full quantitative analysis was performed against calibration standards for each element. Quality control samples (multi-element calibration solution; 100 µL) were inserted and run at regular intervals during the experiment to ensure reliability of the data and to eliminate signal drift or interference.

For statistical analysis, 10 metals were measured for 22 phenotypes (*E. faecalis* OG1RF wild type and 21 mutants) in three nutrient conditions, with 3 biological replicates for each mutant and in each condition. During the ICP-MS run, 3 technical replicates were measured from each sample, which were then averaged and used for statistical analysis. The concentration of



511 the metals in a blank control (500 µl of 69% nitric acid and 250 µl of 31% hydrogen  
512 peroxide) was subtracted from the concentration of metals in the samples. Metals whose  
513 levels were below the detection limit were coded as not detected. For statistical analysis,  
514 metal concentrations were normalized using log base 10 transformation. To test differences  
515 between the metal levels in mutants and the control in each nutrient condition, Welch's two  
516 sample t-tests were performed in R using the t.test function, with correction for multiple  
517 comparisons made using the Benjamini-Hochberg procedure.

## 518 **Author Contributions**

519 D.K. conceptualized the study. D.K., L.N.L., E.M., and K.A.K. designed the experiments,  
 520 analyzed data, and prepared the manuscript. D.K. and L.N.L. performed biofilm experiments  
 521 and analyzed data. A.M. analyzed confocal data and generated 3D reconstruction models.  
 522 D.K. and S.P. performed the ICP-MS experiments. S.U. and R.B.H.W. analyzed  
 523 metabolomics data. D.K., L.E.D., L.N.L., and E.M. performed the electrochemistry  
 524 experiments and analyzed data. L.N.L. and C.B. performed EDS TEM. J.D. and G.D.  
 525 provided the transposon library. All authors reviewed the manuscript.

## Acknowledgments

This work was supported by the National Research Foundation and Ministry of Education Singapore under its Research Centre of Excellence Programme, by the National Research Foundation under its Singapore NRF Fellowship programme (NRF-NRFF2011-11), and by the Ministry of Education Singapore under its Tier 2 programme (MOE2014-T2-2-124). A.M. and his contributions were supported by the National Medical Research Council under its Clinical Basic Research Grant (NMRC/CBRG/0086/2015) awarded to K.A.K. We thank Kenneth Beckman (University of Minnesota) and colleagues for sequencing of the *E. faecalis* transposon library, and Wandy Beatty (Washington University in St. Louis) for performing TEM. We thank SCELSE members Sumitra Debina Mitra, Irina Afonina, Shu Sin Chng, Hans-Kurt Fleming, Scott Rice, and Staffan Kjelleberg, as well as Jeff Gralnick (University of Minnesota) for their critical assessment of the manuscript. The transmission electron microscopy was performed at the Facility for Analysis, Characterization, Testing and Simulation (FACTS), Nanyang Technological University, Singapore.

## References

1. Hufnagel M, Liese C, Loescher C, Kunze M, Proempeler H, Berner R, Krueger M. 2007. Enterococcal colonization of infants in a neonatal intensive care unit: associated predictors, risk factors and seasonal patterns. *BMC Infect Dis* 7:107.
2. Sekirov I, Russell SL, Antunes LC, Finlay BB. 2010. Gut microbiota in health and disease. *Physiol Rev* 90:859-904.
3. Flemming HC, Wingender J, Szewzyk U, Steinberg P, Rice SA, Kjelleberg S. 2016. Biofilms: an emergent form of bacterial life. *Nat Rev Microbiol* 14:563-75.
4. Rice LB. 2005. Antibiotics and gastrointestinal colonization by vancomycin-resistant enterococci. *Eur J Clin Microbiol Infect Dis* 24:804-14.
5. Rice LB, Hutton-Thomas R, Lakticova V, Helfand MS, Donskey CJ. 2004. Beta-lactam antibiotics and gastrointestinal colonization with vancomycin-resistant enterococci. *J Infect Dis* 189:1113-8.
6. Trajkovska-Dokic E, Kaftandzieva A, Stojkovska S, Kuzmanovska A, Panovski N. 2015. Gastrointestinal Colonization with Vancomycin-Resistant Enterococci In Hospitalized and Outpatients. *Open Access Maced J Med Sci* 3:7-11.
7. Bowler PG, Duerden BI, Armstrong DG. 2001. Wound microbiology and associated approaches to wound management. *Clin Microbiol Rev* 14:244-69.
8. Flores-Mireles AL, Walker JN, Caparon M, Hultgren SJ. 2015. Urinary tract infections: epidemiology, mechanisms of infection and treatment options. *Nat Rev Microbiol* doi:10.1038/nrmicro3432.
9. Nallapareddy SR, Singh KV, Sillanpaa J, Garsin DA, Hook M, Erlandsen SL, Murray BE. 2006. Endocarditis and biofilm-associated pili of *Enterococcus faecalis*. *J Clin Invest* 116:2799-807.

- 567 10. Hamada Y, Magarifuchi H, Oho M, Kusaba K, Nagasawa Z, Fukuoka M, Yamakuchi  
568 H, Urakami T, Aoki Y. 2015. Clinical features of enterococcal bacteremia due to  
569 ampicillin-susceptible and ampicillin-resistant enterococci: An eight-year  
570 retrospective comparison study. *J Infect Chemother* 21:527-30.
- 571 11. Baureder M, Hederstedt L. 2012. Genes important for catalase activity in  
572 *Enterococcus faecalis*. *PLoS One* 7:e36725.
- 573 12. Frankenberg L, Brugna M, Hederstedt L. 2002. *Enterococcus faecalis* heme-  
574 dependent catalase. *J Bacteriol* 184:6351-6.
- 575 13. Weinberg ED. 1997. The *Lactobacillus* anomaly: total iron abstinence. *Perspect Biol*  
576 *Med* 40:578-83.
- 577 14. Bruyneel B, Vandewoestyne M, Verstraete W. 1989. Lactic-Acid Bacteria -  
578 Microorganisms Able to Grow in the Absence of Available Iron and Copper.  
579 *Biotechnology Letters* 11:401-406.
- 580 15. Marcelis JH, den Daas-Slagt HJ, Hoogkamp-Korstanje JA. 1978. Iron requirement  
581 and chelator production of staphylococci, *Streptococcus faecalis* and  
582 enterobacteriaceae. *Antonie van Leeuwenhoek* 44:257-67.
- 583 16. Archibald F. 1986. Manganese: its acquisition by and function in the lactic acid  
584 bacteria. *Crit Rev Microbiol* 13:63-109.
- 585 17. Verneuil N, Maze A, Sanguinetti M, Laplace JM, Benachour A, Auffray Y, Giard JC,  
586 Hartke A. 2006. Implication of (Mn)superoxide dismutase of *Enterococcus faecalis* in  
587 oxidative stress responses and survival inside macrophages. *Microbiology* 152:2579-  
588 89.
- 589 18. Riboulet E, Verneuil N, La Carbona S, Sauvageot N, Auffray Y, Hartke A, Giard JC.  
590 2007. Relationships between oxidative stress response and virulence in *Enterococcus*  
591 *faecalis*. *Journal of molecular microbiology and biotechnology* 13:140-6.

- 592 19. Andrews SC, Robinson AK, Rodriguez-Quinones F. 2003. Bacterial iron homeostasis.  
593 FEMS Microbiol Rev 27:215-37.
- 594 20. Alexander J, Kowdley KV. 2009. HFE-associated hereditary hemochromatosis. Genet  
595 Med 11:307-13.
- 596 21. Cao A, Galanello R. 2010. Beta-thalassemia. Genet Med 12:61-76.
- 597 22. Lee T, Clavel T, Smirnov K, Schmidt A, Lagkouvardos I, Walker A, Lucio M,  
598 Michalke B, Schmitt-Kopplin P, Fedorak R, Haller D. 2016. Oral versus intravenous  
599 iron replacement therapy distinctly alters the gut microbiota and metabolome in  
600 patients with IBD. Gut doi:10.1136/gutjnl-2015-309940.
- 601 23. Kopani M, Miglierini M, Lancok A, Dekan J, Caplovicova M, Jakubovsky J, Boca R,  
602 Mrazova H. 2015. Iron oxides in human spleen. Biometals 28:913-28.
- 603 24. Flahaut S, Laplace JM, Frere J, Auffray Y. 1998. The oxidative stress response in  
604 Enterococcus faecalis: relationship between H<sub>2</sub>O<sub>2</sub> tolerance and H<sub>2</sub>O<sub>2</sub> stress  
605 proteins. Lett Appl Microbiol 26:259-64.
- 606 25. Keogh D, Tay WH, Ho YY, Dale JL, Chen S, Umashankar S, Williams RB, Chen SL,  
607 Dunny GM, Kline KA. 2016. Enterococcal Metabolite Cues Facilitate Interspecies  
608 Niche Modulation and Polymicrobial Infection. Cell Host Microbe 20:493-503.
- 609 26. Dale JL, Cagnazzo J, Phan CQ, Barnes AM, Dunny GM. 2015. Multiple roles for  
610 Enterococcus faecalis glycosyltransferases in biofilm-associated antibiotic resistance,  
611 cell envelope integrity, and conjugative transfer. Antimicrob Agents Chemother  
612 59:4094-105.
- 613 27. Seneviratne CJ, Yip JW, Chang JW, Zhang CF, Samaranayake LP. 2013. Effect of  
614 culture media and nutrients on biofilm growth kinetics of laboratory and clinical  
615 strains of Enterococcus faecalis. Arch Oral Biol 58:1327-34.

- 616 28. Barnes AM, Ballering KS, Leibman RS, Wells CL, Dunny GM. 2012. *Enterococcus*  
617 *faecalis* produces abundant extracellular structures containing DNA in the absence of  
618 cell lysis during early biofilm formation. *MBio* 3:e00193-12.
- 619 29. Thomas VC, Hiromasa Y, Harms N, Thurlow L, Tomich J, Hancock LE. 2009. A  
620 fratricidal mechanism is responsible for eDNA release and contributes to biofilm  
621 development of *Enterococcus faecalis*. *Mol Microbiol* 72:1022-36.
- 622 30. Guiton PS, Hung CS, Kline KA, Roth R, Kau AL, Hayes E, Heuser J, Dodson KW,  
623 Caparon MG, Hultgren SJ. 2009. Contribution of autolysin and Sortase a during  
624 *Enterococcus faecalis* DNA-dependent biofilm development. *Infect Immun* 77:3626-  
625 38.
- 626 31. O'Toole GA. 2011. Microtiter dish biofilm formation assay. *J Vis Exp*  
627 doi:10.3791/2437.
- 628 32. Borisov VB, Gennis RB, Hemp J, Verkhovsky MI. 2011. The cytochrome bd  
629 respiratory oxygen reductases. *Biochim Biophys Acta* 1807:1398-413.
- 630 33. Foster AW, Osman D, Robinson NJ. 2014. Metal preferences and metallation. *J Biol*  
631 *Chem* 289:28095-103.
- 632 34. Kristich CJ, Nguyen VT, Le T, Barnes AM, Grindle S, Dunny GM. 2008.  
633 Development and use of an efficient system for random mariner transposon  
634 mutagenesis to identify novel genetic determinants of biofilm formation in the core  
635 *Enterococcus faecalis* genome. *Appl Environ Microbiol* 74:3377-86.
- 636 35. Shi L, Dong H, Reguera G, Beyenal H, Lu A, Liu J, Yu HQ, Fredrickson JK. 2016.  
637 Extracellular electron transfer mechanisms between microorganisms and minerals.  
638 *Nat Rev Microbiol* doi:10.1038/nrmicro.2016.93.
- 639 36. Logan BE. 2009. Exoelectrogenic bacteria that power microbial fuel cells. *Nat Rev*  
640 *Microbiol* 7:375-81.

- 641 37. Embree M, Qiu Y, Shieu W, Nagarajan H, O'Neil R, Lovley D, Zengler K. 2014. The  
642 iron stimulon and fur regulon of *Geobacter sulfurreducens* and their role in energy  
643 metabolism. *Appl Environ Microbiol* 80:2918-27.
- 644 38. Yang Y, Harris DP, Luo F, Wu L, Parsons AB, Palumbo AV, Zhou J. 2008.  
645 Characterization of the *Shewanella oneidensis* Fur gene: roles in iron and acid  
646 tolerance response. *BMC Genomics* 9 Suppl 1:S11.
- 647 39. Okamoto A, Nakamura R, Hashimoto K. 2011. In-vivo identification of direct  
648 electron transfer from *Shewanella oneidensis* MR-1 to electrodes via outer-membrane  
649 OmcA-MtrCAB protein complexes. *Electrochimica Acta* 56:5526-5531.
- 650 40. Marsili E, Rollefson JB, Baron DB, Hozalski RM, Bond DR. 2008. Microbial biofilm  
651 voltammetry: direct electrochemical characterization of catalytic electrode-attached  
652 biofilms. *Appl Environ Microbiol* 74:7329-37.
- 653 41. von Canstein H, Ogawa J, Shimizu S, Lloyd JR. 2008. Secretion of flavins by  
654 *Shewanella* species and their role in extracellular electron transfer. *Appl Environ*  
655 *Microbiol* 74:615-23.
- 656 42. Wang Y, Kern SE, Newman DK. 2010. Endogenous phenazine antibiotics promote  
657 anaerobic survival of *Pseudomonas aeruginosa* via extracellular electron transfer. *J*  
658 *Bacteriol* 192:365-9.
- 659 43. Schröder U, Harnisch F, Angenent LT. 2015. Microbial electrochemistry and  
660 technology: terminology and classification. *Energy & Environmental Science* 8:513-  
661 519.
- 662 44. Aeschbacher M, Sander M, Schwarzenbach RP. 2010. Novel electrochemical  
663 approach to assess the redox properties of humic substances. *Environ Sci Technol*  
664 44:87-93.



- 665 45. Kim E, Gordonov T, Bentley WE, Payne GF. 2013. Amplified and in Situ Detection  
666 of Redox-Active Metabolite Using a Biobased Redox Capacitor. *Analytical*  
667 *Chemistry* 85:2102-2108.
- 668 46. Abbaspour N, Hurrell R, Kelishadi R. 2014. Review on iron and its importance for  
669 human health. *J Res Med Sci* 19:164-74.
- 670 47. Lebreton F, Willems RJL, Gilmore MS. 2014. Enterococcus Diversity, Origins in  
671 Nature, and Gut Colonization. *In* Gilmore MS, Clewell DB, Ike Y, Shankar N (ed),  
672 *Enterococci: From Commensals to Leading Causes of Drug Resistant Infection*,  
673 Boston.
- 674 48. Kim GT, Hyun MS, Chang IS, Kim HJ, Park HS, Kim BH, Kim SD, Wimpenny JW,  
675 Weightman AJ. 2005. Dissimilatory Fe(III) reduction by an electrochemically active  
676 lactic acid bacterium phylogenetically related to *Enterococcus gallinarum* isolated  
677 from submerged soil. *J Appl Microbiol* 99:978-87.
- 678 49. Zhang E, Cai Y, Luo Y, Piao Z. 2014. Riboflavin-shuttled extracellular electron  
679 transfer from *Enterococcus faecalis* to electrodes in microbial fuel cells. *Can J*  
680 *Microbiol* 60:753-9.
- 681 50. Lechardeur D, Cesselin B, Fernandez A, Lamberet G, Garrigues C, Pedersen M,  
682 Gaudu P, Gruss A. 2011. Using heme as an energy boost for lactic acid bacteria. *Curr*  
683 *Opin Biotechnol* 22:143-9.
- 684 51. Richardson DJ. 2000. Bacterial respiration: a flexible process for a changing  
685 environment. *Microbiology* 146 ( Pt 3):551-71.
- 686 52. Winstedt L, Frankenberg L, Hederstedt L, von Wachenfeldt C. 2000. *Enterococcus*  
687 *faecalis* V583 contains a cytochrome bd-type respiratory oxidase. *J Bacteriol*  
688 182:3863-6.

- 689 53. Pedersen MB, Gaudu P, Lechardeur D, Petit MA, Gruss A. 2012. Aerobic respiration  
690 metabolism in lactic acid bacteria and uses in biotechnology. *Annu Rev Food Sci*  
691 *Technol* 3:37-58.
- 692 54. Rezaiki L, Lamberet G, Derre A, Gruss A, Gaudu P. 2008. *Lactococcus lactis*  
693 produces short-chain quinones that cross-feed Group B *Streptococcus* to activate  
694 respiration growth. *Mol Microbiol* 67:947-57.
- 695 55. Miethke M, Marahiel MA. 2007. Siderophore-based iron acquisition and pathogen  
696 control. *Microbiol Mol Biol Rev* 71:413-51.
- 697 56. Vebo HC, Snipen L, Nes IF, Brede DA. 2009. The transcriptome of the nosocomial  
698 pathogen *Enterococcus faecalis* V583 reveals adaptive responses to growth in blood.  
699 *PLoS ONE* 4:e7660.
- 700 57. Vebo HC, Solheim M, Snipen L, Nes IF, Brede DA. 2010. Comparative genomic  
701 analysis of pathogenic and probiotic *Enterococcus faecalis* isolates, and their  
702 transcriptional responses to growth in human urine. *PLoS ONE* 5:e12489.
- 703 58. Waldron KJ, Robinson NJ. 2009. How do bacterial cells ensure that metalloproteins  
704 get the correct metal? *Nat Rev Microbiol* 7:25-35.
- 705 59. Dunny GM, Brown BL, Clewell DB. 1978. Induced cell aggregation and mating in  
706 *Streptococcus faecalis*: evidence for a bacterial sex pheromone. *Proc Natl Acad Sci U*  
707 *S A* 75:3479-83.
- 708 60. Debroy S, van der Hoeven R, Singh KV, Gao P, Harvey BR, Murray BE, Garsin DA.  
709 2012. Development of a genomic site for gene integration and expression in  
710 *Enterococcus faecalis*. *J Microbiol Methods* 90:1-8.
- 711 61. Paganelli FL, Willems RJ, Jansen P, Hendrickx A, Zhang X, Bonten MJ, Leavis HL.  
712 2013. *Enterococcus faecium* biofilm formation: identification of major autolysin

713           AtlAEfm, associated Acn surface localization, and AtlAEfm-independent  
714           extracellular DNA Release. MBio 4:e00154.

715   62.   Schindelin J, Arganda-Carreras I, Frise E, Kaynig V, Longair M, Pietzsch T,  
716           Preibisch S, Rueden C, Saalfeld S, Schmid B, Tinevez JY, White DJ, Hartenstein V,  
717           Eliceiri K, Tomancak P, Cardona A. 2012. Fiji: an open-source platform for  
718           biological-image analysis. Nat Methods 9:676-82.

719   63.   Sbalzarini IF, Koumoutsakos P. 2005. Feature point tracking and trajectory analysis  
720           for video imaging in cell biology. J Struct Biol 151:182-95.

721   64.   Team RC. 2016. R: A Language and Environment for Statistical Computing.

722   65.   Rolfe MD, Rice CJ, Lucchini S, Pin C, Thompson A, Cameron AD, Alston M,  
723           Stringer MF, Betts RP, Baranyi J, Peck MW, Hinton JC. 2012. Lag phase is a distinct  
724           growth phase that prepares bacteria for exponential growth and involves transient  
725           metal accumulation. J Bacteriol 194:686-701.

726

727

## Figures

**Figure 1: *E. faecalis* flow cell biofilms in iron supplemented media.** (a) CSLM images at 8, 12, and 18 hr for normal (10 % TSBG) and supplemented (10% TSBG plus 0.2 mM  $\text{FeCl}_3$ ). Selected optical sections at the indicated depths are followed by representative lateral view in YZ at the right of each image set. Scale bar 100  $\mu\text{m}$ . (b) 3D reconstructions of high magnification CLSM stacks of *E. faecalis* flow cell biofilms grown in normal or supplemented medium for 18 hr at 37 °C or 120 hr at 22 °C. Biofilm depth is color-coded as indicated on z-depth scale (0 to 24  $\mu\text{m}$ ) and the lateral box dimensions are 85 x 85  $\mu\text{m}$  (20  $\mu\text{m}$  between ticks).

**Figure 2: Electron micrographs of the *E. faecalis* biofilm matrix with iron supplementation.** Representative images from TEM of *E. faecalis* biofilm from flow cell in normal 10 % TSBG (a, b, c) or 10 % TSBG supplemented with 0.2 mM  $\text{FeCl}_3$  (d, e, f). In a-f, scale bars represent 2  $\mu\text{m}$  (black) and 0.5  $\mu\text{m}$  (white), and red arrows highlight examples of electron dense particles. The biofilm matrix from biofilms grown in normal media (g, h, i) or with iron supplementation (j, k, l) was examined by HAADF STEM and EDS mapping at 300,000x magnification: HAADF STEM (g, j), iron EDS map (h, k), and merged EDS-STEM images (i, l) are shown at 300,000x magnification. Scale bars in g-l represent 1  $\mu\text{m}$ . The EDS spectra for iron, corresponding to the images are shown in m.

**Figure 3: *E. faecalis* biofilm growth under metal supplementation.** (a) Time course of *E. faecalis* biofilm growth in TSBG supplemented with FeCl<sub>3</sub>. (b) *E. faecalis* biofilm growth at 120hr in TSBG supplemented with metals as indicated. (c) ICP-MS analysis of *E. faecalis* grown in TSBG (normal) and TSBG supplemented with 2mM FeCl<sub>3</sub> (Supplemented). (a and b) Data at each time point or metal supplement represents an independent experiment, with the data merged for representation. (a-c) n = 3 biological replicates. Statistical significance was determined by two-way ANOVA with Tukey's test for multiple comparisons, n = 3 with four technical replicates, \*  $P \leq 0.05$ , \*\*  $P \leq 0.01$ , \*\*\*  $P \leq 0.001$ , \*\*\*\*  $P \leq 0.0001$ . (a) Statistical analysis was calculated with time set as a 'repeated measure'. (a, b, c) error bars represent standard deviation (SD) from the mean.

**Figure 4: Extracellular electron transfer in *E. faecalis* biofilm.** (a) Chronocoulometry current (Q) measurement, expressed in milicoulombs (mC), of *E. faecalis* biofilm on a screen-printed carbon mini-electrode over 40 hr in TSBG supplemented with 2mM FeCl<sub>3</sub> (Supplemented). Abiotic controls and media controls are indicated. Statistical significance was determined by one-way ANOVA with Tukey's test for multiple comparisons, n = 3 biological replicates, error bars represent SD from the mean, \*\*\*\*  $P \leq 0.0001$ . (b) Chronocoulometry of *E. faecalis* biofilm in iron supplemented medium with a chelator spike (10 mM 2,2'-dipyridyl) at 7.5 hr. Representative data from four independent experiments are shown, where the trend is consistent among all experiments. Statistical significance was determined by a paired two-tailed t-test, error bars (light-green or -red shading) represent SD from the mean, \*\*\*\*  $P \leq 0.0001$ .

**Figure 5: Fermentation and EET-dependent respiration metabolism in *E. faecalis***

**biofilm.** Schematic model for *E. faecalis* biofilm metabolism describing EET through DET and MET mechanisms. ATP is generated by proton flow through membrane integrated ATP synthases. Glycolysis and fermentation are required prior to EET-dependent respiration. This generates the fermentation end-products required as substrates for dehydrogenases acting as electron donors. DET occurs in the absence of heme, where extracellular iron can be reduced and thereby serve as an iron sink for electrons of the respiratory electron transport chain. MET occurs in the absence of heme, when iron is transported intracellularly and reduced, thereafter being exported and serving as an electron mediator/shuttle.

**Figure S1: *E. faecalis* planktonic growth under metal supplementation.** (a) Time course enumeration of *E. faecalis* planktonic growth over 24hr in TSBG and TSBG supplemented with 2mM FeCl<sub>3</sub>. n = 3 biological replicates, error bars represent standard deviation (SD) from the mean.

**Figure S2: Metal precipitation control.** Static incubation of TSBG medium supplemented with FeCl<sub>3</sub> over time. n = 2 replicates, error bars represent standard deviation (SD) from the mean.

**Figure S3: Electron micrographs of the *E. faecalis* biofilm matrix in the absence or presence of metal supplementation.** Representative images from TEM of *E. faecalis* biofilm from 24 hr static biofilms grown in normal TSBG (a, e), TSBG supplemented with 2 mM FeCl<sub>3</sub> (b, e), or 50 uM heme (c, f). Scale bars represent 2 µm (black) and 0.5 µm (white).

796

797 **Figure S4: Transposon library screen for mutants exhibiting changes in biofilm**  
 798 **accumulation under iron supplementation.** (a) Flow chart of screen process including  
 799 evaluation criteria for biofilm assays. (b-g) Secondary validation data for mutants passing  
 800 primary evaluation. Light grey indicates normal medium and dark grey indicates iron  
 801 supplemented medium. Secondary validation bar charts represent individual experiments and  
 802 are separately presented, rather than being pooled, for greater clarity.

803

804 **Figure S5: Biofilm biovolume and metal-dependence of *E. faecalis* EET.** CLSM images  
 805 of *E. faecalis* biofilm on screen-printed electrode (SPE) at the end of chronocoulometry  
 806 measurements after 20 hrs growth in (a) normal TSBG or (b) TSBG supplemented with 2  
 807 mM FeCl<sub>3</sub>. (c) Charge (mC) transferred from *E. faecalis* biofilm to the SPE after 20 hr in  
 808 normal TSBG, TSBG supplemented with 2mM FeCl<sub>3</sub>, 2mM manganese chloride (MnCl<sub>2</sub>), 2  
 809 mM magnesium sulfate (MgSO<sub>4</sub>), or 50uM heme. These results were measured in glass  
 810 electrochemical cells willed with 11 mL growth medium. All the other parameters are the  
 811 same described in the Materials and Methods section. The working electrode was poised at  
 812 200 mV vs the silver pseudoreference electrode of the SPE.

813

814 **Table S1: Metallome of *E. faecalis* in normal and iron supplemented conditions**

815

816 **Table S2: Metallome comparison of *E. faecalis* mutants versus wild type in normal**  
 817 **condition**

818

819 **Table S3: Metallome comparison of *E. faecalis* mutants versus wild type in deplete**  
820 **condition**

821

822 **Table S4: Metallome comparison of *E. faecalis* mutants versus wild type in**  
823 **supplemented condition**

824

825 **Table S5: *E. faecalis* mutants in deplete condition where iron was not detected**

826

827 **Table S6: *E. faecalis* components involved in iron-induced biofilm growth**

828

829



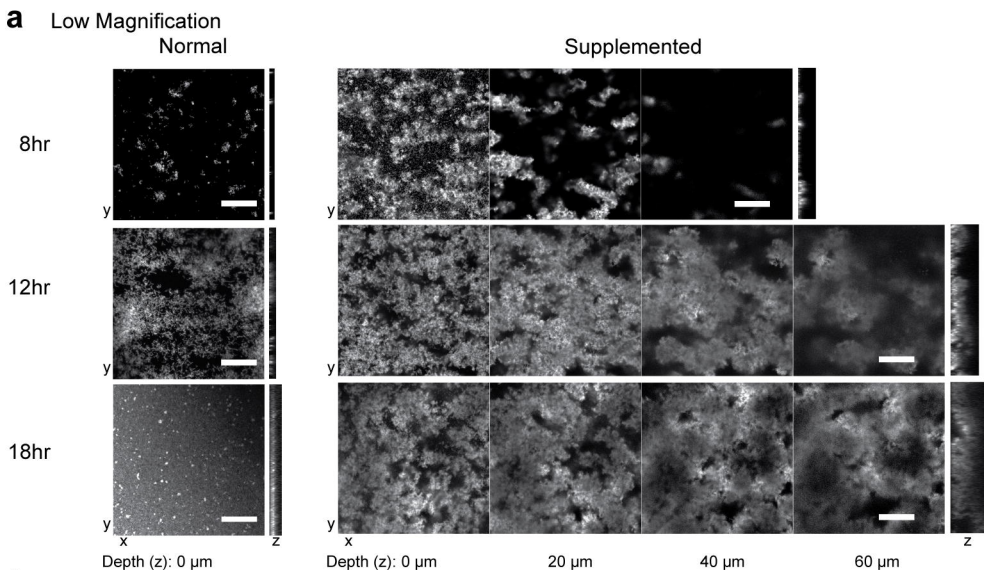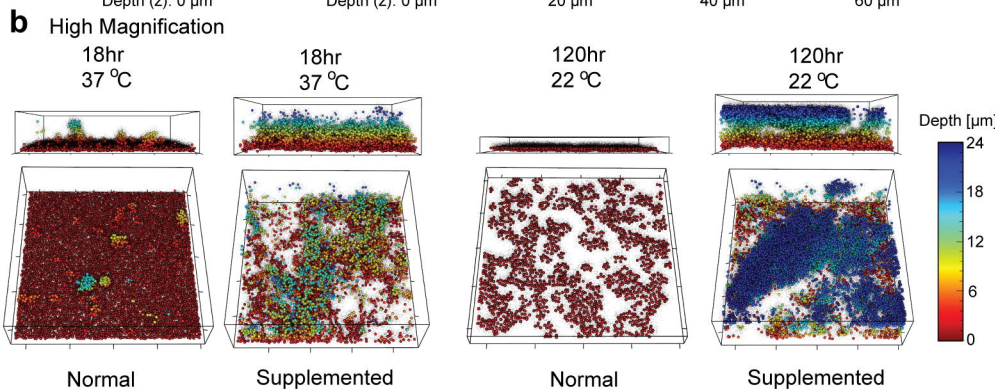

Normal Media

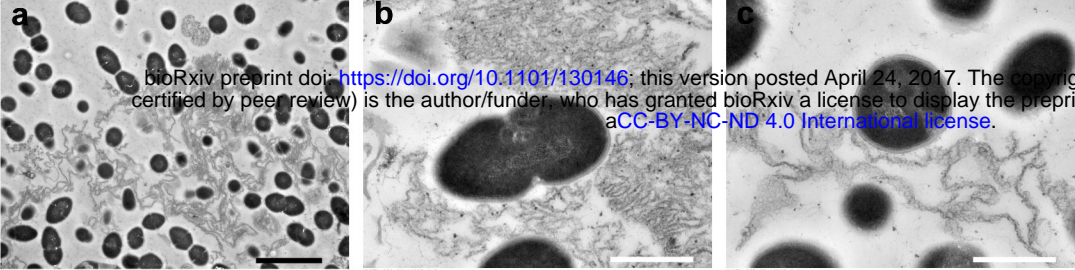

Iron Supplemented

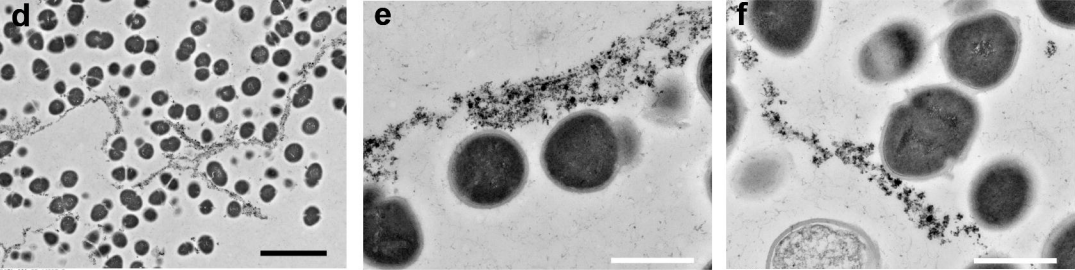

Normal Media

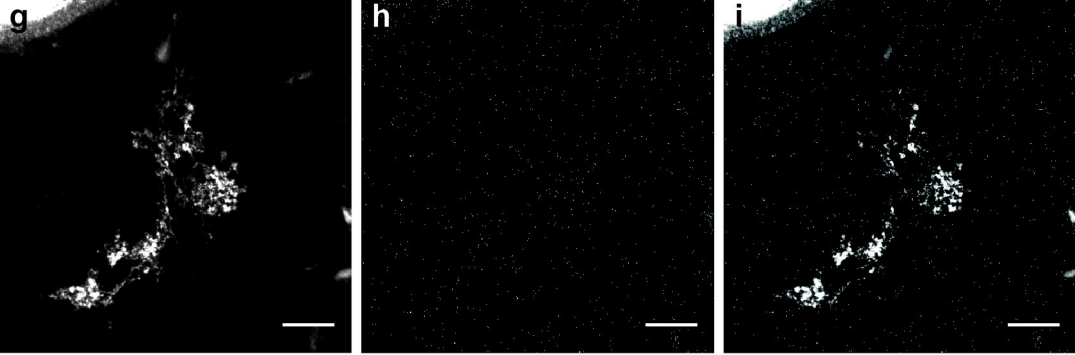

Iron Supplemented

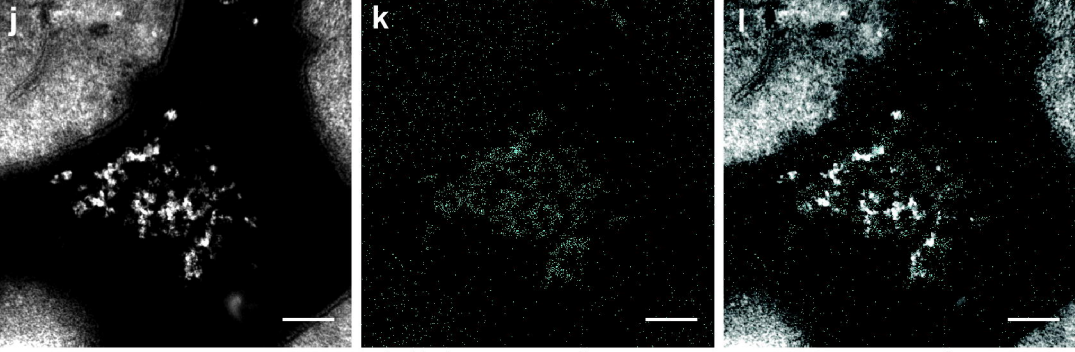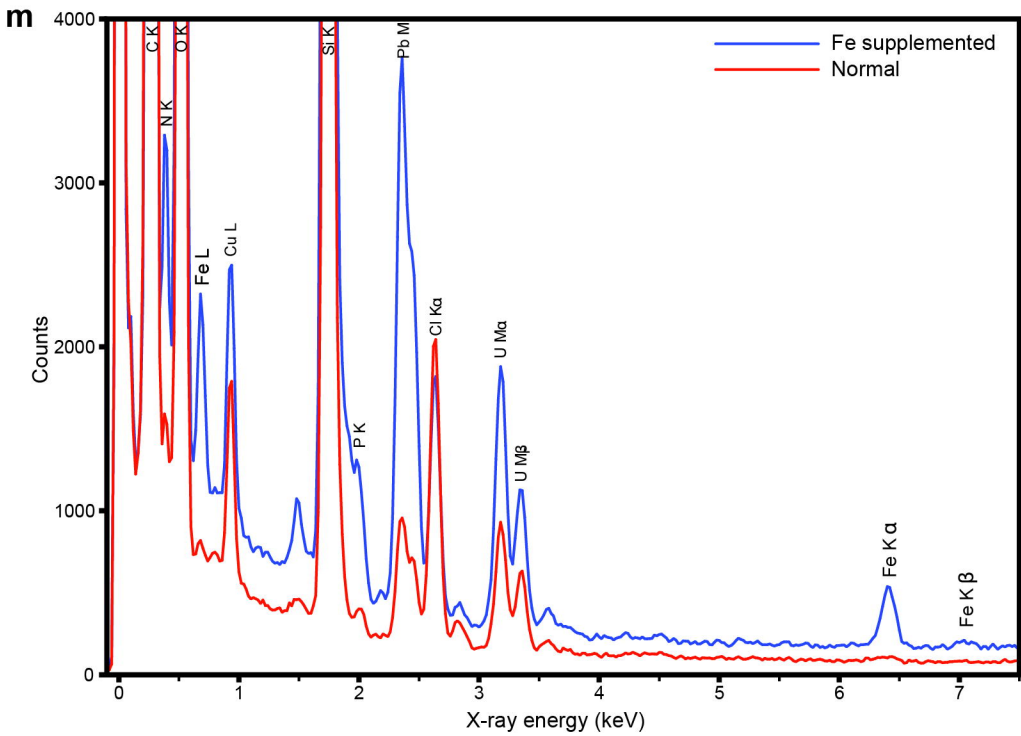

**a**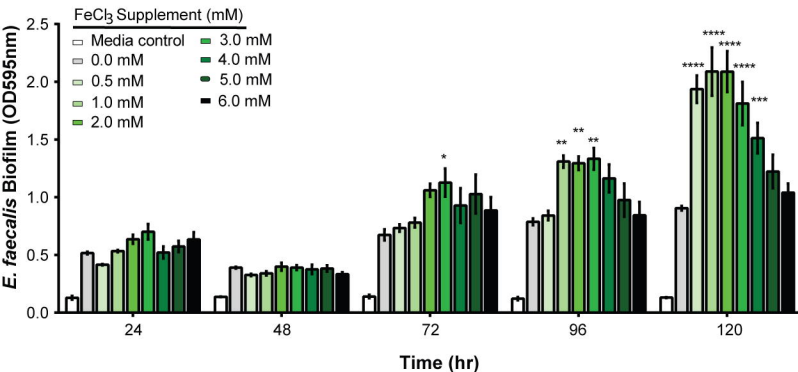**c**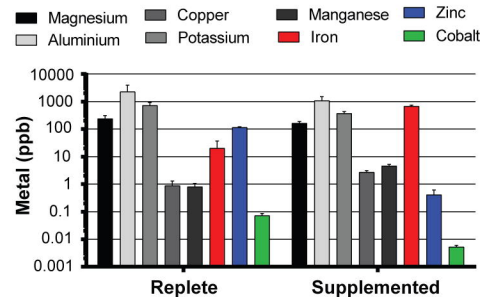**b**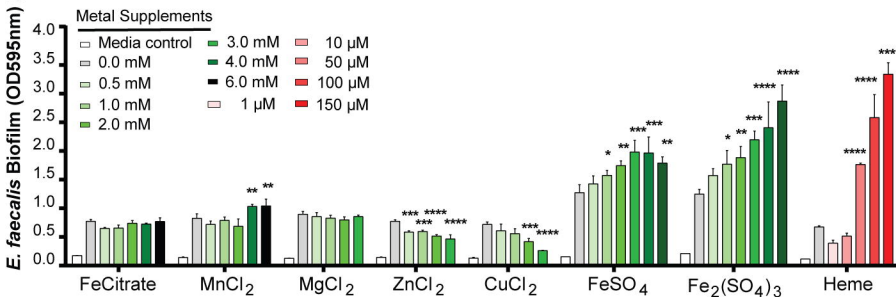

**a**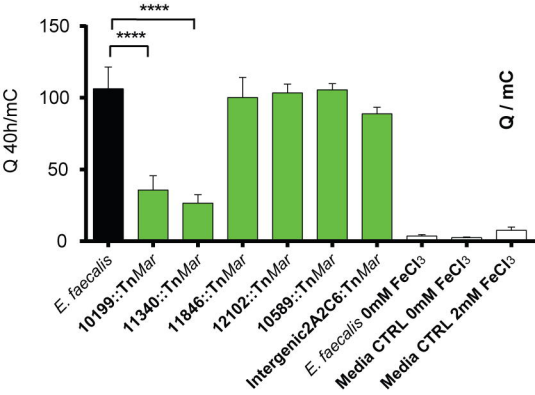**b**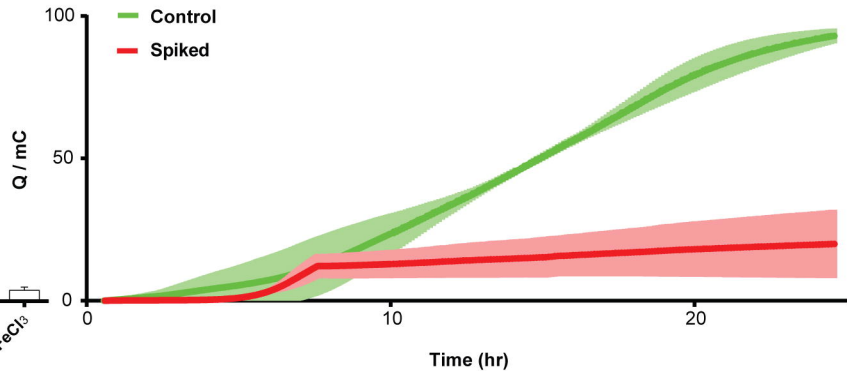

e<sup>-</sup> Transport, EET &  
Iron Reduction

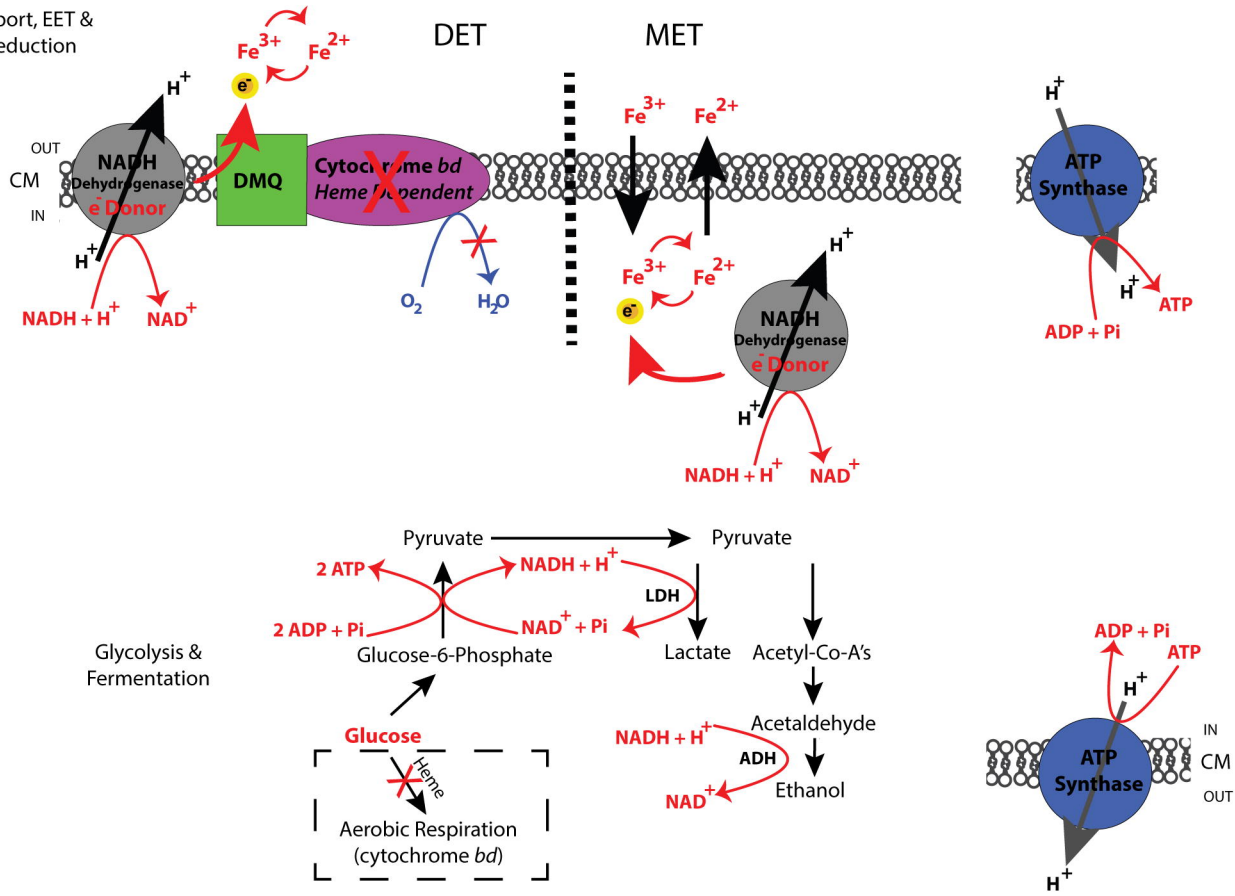

Source: http://www.biorxiv.org/content/10.1101/130146v1.full.pdf
